# Supplementary material
Source: PubMed Central journal article supplement (PMC3256384)
Supplement: psb0610_1554SD1.pdf [file psb0610_1554SD1.pdf]

1X10<sup>6</sup>

A

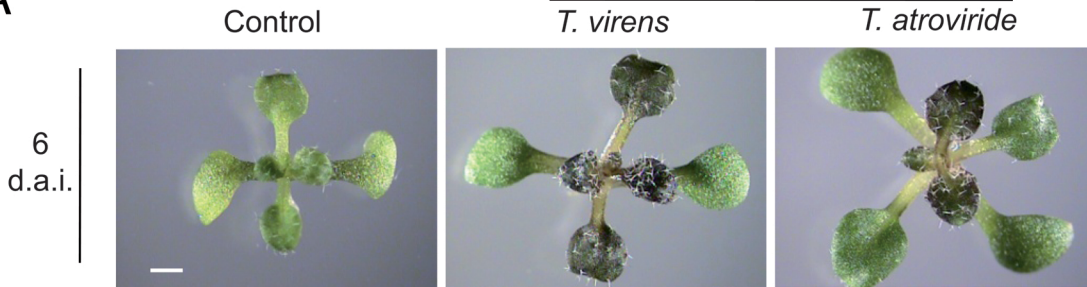

B

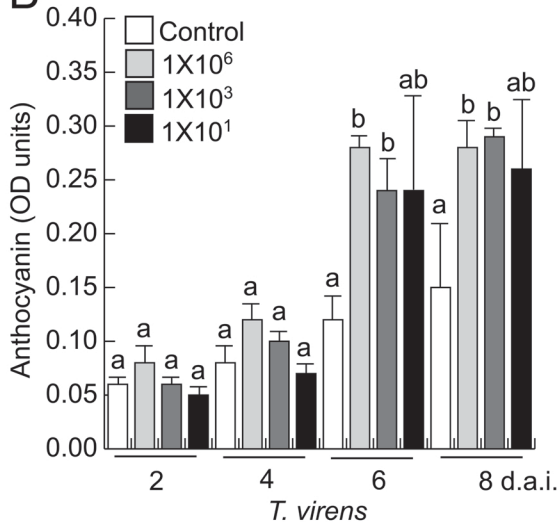

C

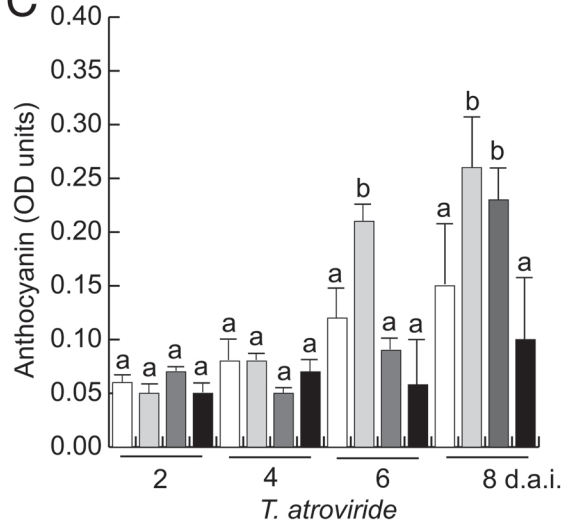

Supplementary figure S1. Anthocyanin accumulation in response to *Trichoderma* inoculation. *Arabidopsis* seedlings were germinated and grown for 4-d on MS plates and then inoculated with  $10^6$ ,  $10^3$  and  $10^1$  *Trichoderma* conidia. (A-C), Anthocyanin levels in seedlings were determined every two days in a kinetic plant-fungus co-cultivation experiment. Control plants (white bars) were treated with water. The bars show the means ( $\pm$ SD) of four replicate plates containing five seedlings each. Different letters are used to indicate means that differ significantly ( $P < 0.05$ ). The experiment was repeated three times with similar results.

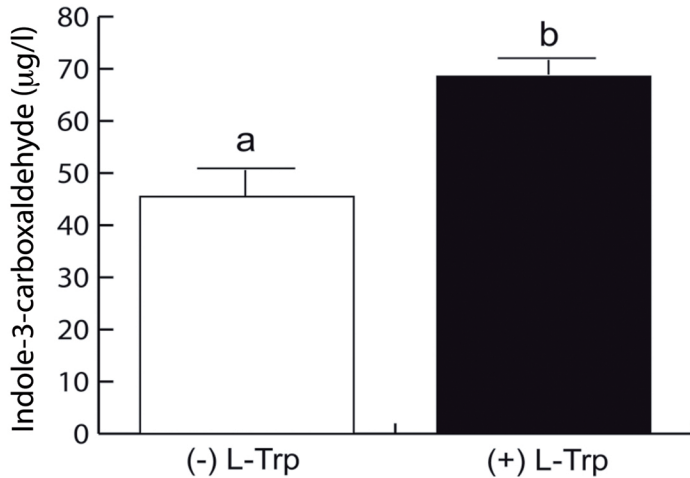

Supplementary figure S2. Quantification of ICAlD from *T. virens* culture medium supplemented or not with L-Trp. Bars represent the mean  $\pm$  SD of three independent cultures that were extracted for ICAlD determinations. Different letters are used to indicate means that differ significantly ( $P < 0.05$ ). The experiment was repeated twice with similar results.

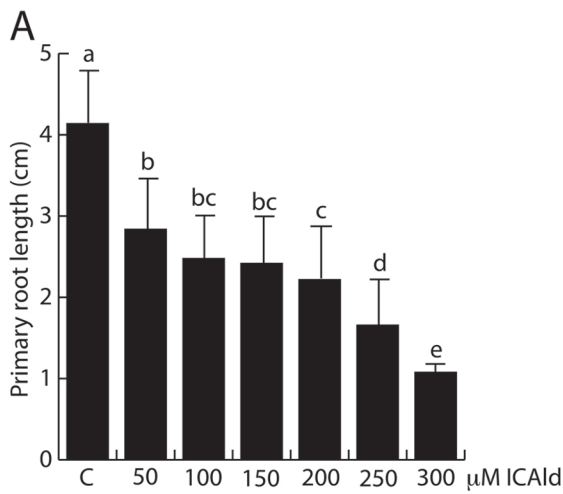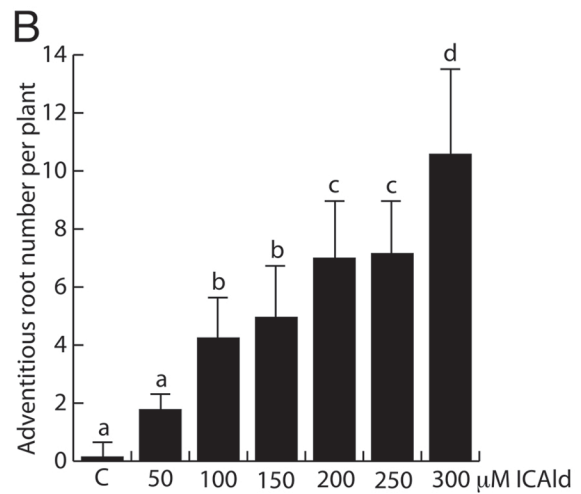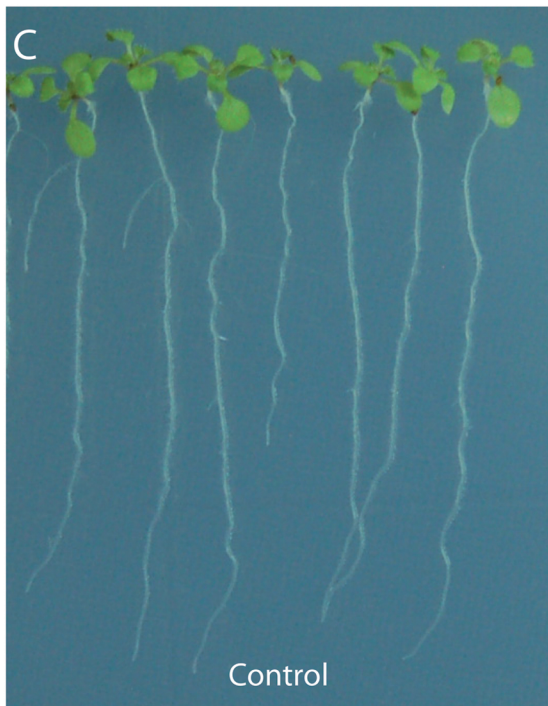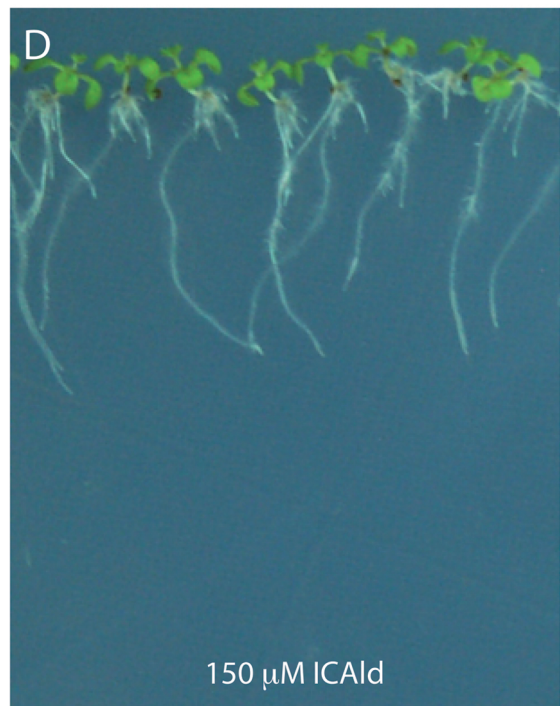

Supplementary figure S3. Effect of ICAId on Arabidopsis root development. Arabidopsis (Col-0) seedlings were germinated and grown for 12d under increased ICAId concentrations. (A) Primary root length. (B) Adventitious root number. (C–D) Representative photographs of control seedlings and seedlings treated with 150  $\mu\text{M}$  ICAId. Values represent the means of 30 seedlings  $\pm$  SD. Different letters represent means statistically different ( $P < 0.05$ ). The experiment was repeated twice with similar results.
